# Supplementary material for: Reply to the ‘Comment on “A K2Fe4O7 superionic conductor for all-solid-state potassium metal batteries”’, by D. Brogioli, M. Tribbia, M. Gockeln, J. Glenneberg, J. Schwenzel and F. LaMantia, J. Mater. Chem. A, 2023, 11, https://doi.org/D3TA01240A
Source: Royal Society of Chemistry journal article supplement (doi:10.1039/d3ta03324d), 2024-01-01

# checkCIF/PLATON report

You have not supplied any structure factors. As a result the full set of tests cannot be run.

THIS REPORT IS FOR GUIDANCE ONLY. IF USED AS PART OF A REVIEW PROCEDURE FOR PUBLICATION, IT SHOULD NOT REPLACE THE EXPERTISE OF AN EXPERIENCED CRYSTALLOGRAPHIC REFEREE.

No syntax errors found.      CIF dictionary      Interpreting this report

## Datablock: sad

---

Bond precision:    Fe- O = 0.0049 A                      Wavelength=0.71073

Cell:                      a=5.155(5)              b=5.155(5)              c=6.902(13)  
                                alpha=90              beta=90              gamma=120  
Temperature:              296 K

|                | Calculated               | Reported    |
|----------------|--------------------------|-------------|
| Volume         | 158.8(5)                 | 158.9(4)    |
| Space group    | P -3 1 m                 | P-31m       |
| Hall group     | -P 3 2                   | ?           |
| Moiety formula | Fe4 O7, K0.48, 12(K0.13) | Fe4 K2 O7   |
| Sum formula    | Fe4 K1.98 O7             | Fe4 K2 O7   |
| Mr             | 412.82                   | 413.60      |
| Dx,g cm-3      | 4.317                    | 4.323       |
| Z              | 1                        | 1           |
| Mu (mm-1)      | 10.243                   | 10.252      |
| F000           | 197.6                    | 198.0       |
| F000'          | 199.47                   |             |
| h,k,lmax       | 7,7,9                    | 7,7,9       |
| Nref           | 202                      | 198         |
| Tmin,Tmax      | 0.238,0.324              | 0.236,0.332 |
| Tmin'          | 0.207                    |             |

Correction method= EMPIRICAL

Data completeness= 0.980                      Theta(max)= 30.850

R(reflections)= 0.0327( 194)                      wR2(reflections)= 0.1214( 198)

S = 1.125                      Npar= 21

---

The following ALERTS were generated. Each ALERT has the format  
**test-name\_ALERT\_alert-type\_alert-level.**  
Click on the hyperlinks for more details of the test.

---

### ● Alert level C

|                   |                                                  |            |
|-------------------|--------------------------------------------------|------------|
| PLAT029_ALERT_3_C | _diffn_measured_fraction_theta_full Low .....    | 0.971      |
| PLAT041_ALERT_1_C | Calc. and Reported SumFormula Strings Differ     | ? Check    |
| PLAT068_ALERT_1_C | Reported F000 Differs from Calcd (or Missing)... | ? Check    |
| PLAT088_ALERT_3_C | Poor Data / Parameter Ratio .....                | 9.62       |
| PLAT148_ALERT_3_C | su on the c - Axis is (Too) Large .....          | 0.013 Ang. |

### ● Alert level G

FORMU01\_ALERT\_2\_G There is a discrepancy between the atom counts in the  
\_chemical\_formula\_sum and the formula from the \_atom\_site\* data.  
Atom count from \_chemical\_formula\_sum: Fe4 K2 O7  
Atom count from the \_atom\_site data: Fe4 K1.98 O7

PLAT004\_ALERT\_5\_G Info: Polymeric Structure Found with Dimension . 3

PLAT005\_ALERT\_5\_G No \_iucr\_refine\_instructions\_details in the CIF ? Do !

PLAT042\_ALERT\_1\_G Calc. and Reported MoietyFormula Strings Differ ? Check

PLAT301\_ALERT\_3\_G Note: Main Residue Disorder ..... 1 %

PLAT774\_ALERT\_1\_G Suspect X-Y Bond in CIF: FE1 -- K1' .. 3.51 Ang.

PLAT779\_ALERT\_4\_G Suspect or Irrelevant (Bond) Angle in CIF .... # 274  
K1' -O1 -K1' 8.565 1.555 2.655 37.40 Deg.

PLAT779\_ALERT\_4\_G Suspect or Irrelevant (Bond) Angle in CIF .... # 279  
K1' -O1 -K1 2.655 1.555 1.555 12.50 Deg.

PLAT779\_ALERT\_4\_G Suspect or Irrelevant (Bond) Angle in CIF .... # 283  
K1' -O1 -K1 8.565 1.555 7.665 12.50 Deg.

PLAT779\_ALERT\_4\_G Suspect or Irrelevant (Bond) Angle in CIF .... # 290  
K1' -O1 -K1' 2.655 1.555 3.665 22.40 Deg.

PLAT779\_ALERT\_4\_G Suspect or Irrelevant (Bond) Angle in CIF .... # 291  
K1 -O1 -K1' 1.555 1.555 3.665 12.80 Deg.

PLAT779\_ALERT\_4\_G Suspect or Irrelevant (Bond) Angle in CIF .... # 296  
K1' -O1 -K1' 8.565 1.555 7.665 22.40 Deg.

PLAT779\_ALERT\_4\_G Suspect or Irrelevant (Bond) Angle in CIF .... # 299  
K1 -O1 -K1' 7.665 1.555 7.665 12.80 Deg.

PLAT779\_ALERT\_4\_G Suspect or Irrelevant (Bond) Angle in CIF .... # 304  
K1' -O1 -K1' 8.565 1.555 9.555 18.50 Deg.

PLAT779\_ALERT\_4\_G Suspect or Irrelevant (Bond) Angle in CIF .... # 307  
K1 -O1 -K1' 7.665 1.555 9.555 10.15 Deg.

PLAT779\_ALERT\_4\_G Suspect or Irrelevant (Bond) Angle in CIF .... # 309  
K1' -O1 -K1' 7.665 1.555 9.555 20.50 Deg.

PLAT779\_ALERT\_4\_G Suspect or Irrelevant (Bond) Angle in CIF .... # 314  
K1' -O1 -K1' 2.655 1.555 1.555 18.50 Deg.

PLAT779\_ALERT\_4\_G Suspect or Irrelevant (Bond) Angle in CIF .... # 315  
K1 -O1 -K1' 1.555 1.555 1.555 10.15 Deg.

PLAT779\_ALERT\_4\_G Suspect or Irrelevant (Bond) Angle in CIF .... # 317  
K1' -O1 -K1' 3.665 1.555 1.555 20.50 Deg.

PLAT779\_ALERT\_4\_G Suspect or Irrelevant (Bond) Angle in CIF .... # 351  
K1' -O2 -K1' 2.545 1.555 8.455 35.70 Deg.

PLAT779\_ALERT\_4\_G Suspect or Irrelevant (Bond) Angle in CIF .... # 352  
K1' -O2 -K1' 9.445 1.555 8.455 24.30 Deg.

PLAT779\_ALERT\_4\_G Suspect or Irrelevant (Bond) Angle in CIF .... # 358  
K1' -O2 -K1' 8.565 1.555 2.655 35.70 Deg.

PLAT779\_ALERT\_4\_G Suspect or Irrelevant (Bond) Angle in CIF .... # 361  
K1' -O2 -K1' 3.665 1.555 2.655 24.30 Deg.

PLAT779\_ALERT\_4\_G Suspect or Irrelevant (Bond) Angle in CIF .... # 368  
K1' -O2 -K1' 2.545 1.555 1.445 24.30 Deg.

PLAT779\_ALERT\_4\_G Suspect or Irrelevant (Bond) Angle in CIF .... # 371  
K1' -O2 -K1' 7.655 1.555 1.445 35.70 Deg.

PLAT779\_ALERT\_4\_G Suspect or Irrelevant (Bond) Angle in CIF .... # 377  
K1' -O2 -K1' 8.565 1.555 7.665 24.30 Deg.

PLAT779\_ALERT\_4\_G Suspect or Irrelevant (Bond) Angle in CIF .... # 382  
K1' -O2 -K1' 1.455 1.555 7.665 35.70 Deg.

PLAT794\_ALERT\_5\_G Note: Tentative Bond Valency for Fe1 (III) 2.98

---

0 **ALERT level A** = Most likely a serious problem - resolve or explain  
0 **ALERT level B** = A potentially serious problem, consider carefully  
5 **ALERT level C** = Check. Ensure it is not caused by an omission or oversight  
30 **ALERT level G** = General information/check it is not something unexpected

4 ALERT type 1 CIF construction/syntax error, inconsistent or missing data  
1 ALERT type 2 Indicator that the structure model may be wrong or deficient  
4 ALERT type 3 Indicator that the structure quality may be low  
21 ALERT type 4 Improvement, methodology, query or suggestion  
5 ALERT type 5 Informative message, check

---

It is advisable to attempt to resolve as many as possible of the alerts in all categories. Often the minor alerts point to easily fixed oversights, errors and omissions in your CIF or refinement strategy, so attention to these fine details can be worthwhile. In order to resolve some of the more serious problems it may be necessary to carry out additional measurements or structure refinements. However, the purpose of your study may justify the reported deviations and the more serious of these should normally be commented upon in the discussion or experimental section of a paper or in the "special\_details" fields of the CIF. checkCIF was carefully designed to identify outliers and unusual parameters, but every test has its limitations and alerts that are not important in a particular case may appear. Conversely, the absence of alerts does not guarantee there are no aspects of the results needing attention. It is up to the individual to critically assess their own results and, if necessary, seek expert advice.

### **Publication of your CIF in IUCr journals**

A basic structural check has been run on your CIF. These basic checks will be run on all CIFs submitted for publication in IUCr journals (*Acta Crystallographica*, *Journal of Applied Crystallography*, *Journal of Synchrotron Radiation*); however, if you intend to submit to *Acta Crystallographica Section C* or *E*, you should make sure that full publication checks are run on the final version of your CIF prior to submission.

### **Publication of your CIF in other journals**

Please refer to the *Notes for Authors* of the relevant journal for any special instructions relating to CIF submission.

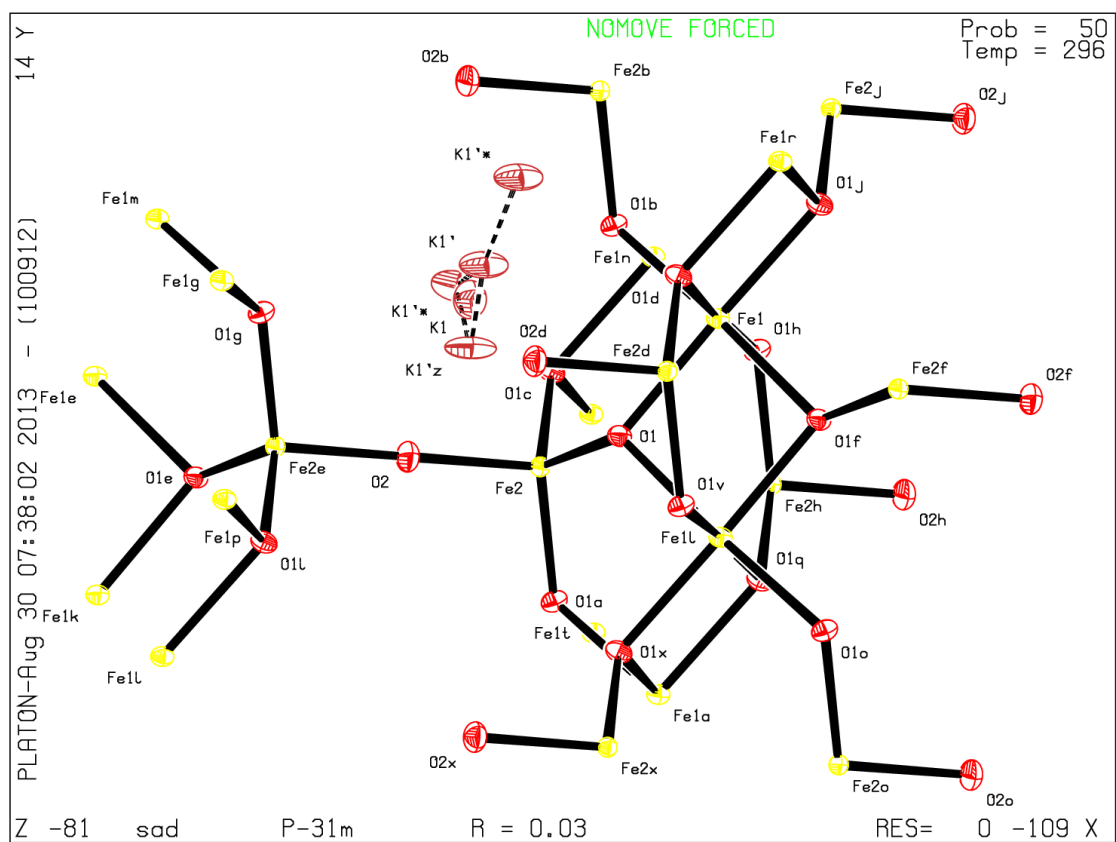

Supplement: d3ta03324d1.zip [file d3ta03324d1.zip]
